# Supplementary material for: Effects of Crude Extract of Glycyrrhiza Radix and Atractylodes macrocephala on Immune and Antioxidant Capacity of SPF White Leghorn Chickens in an Oxidative Stress Model
Source: MDPI journal article supplement (doi:10.3390/antiox13050578), 2024-05-08
Supplement: s1 [file s1]

**Table S1.** Analysis composition of basal diets and nutrient level (air-dry basis, %).

| Ingredient (g/kg)                     | Inclusion |
|---------------------------------------|-----------|
| Corn                                  | 610.62    |
| Soybean meal, (CP 43%)                | 336       |
| Limestone, (Ca 38%)                   | 18        |
| Phosphate, (21/27%)                   | 12        |
| Vegetable oil                         | 9         |
| Salt                                  | 4         |
| Mineral premix <sup>1)</sup>          | 2.5       |
| DL-methionine, 99%                    | 3.700     |
| L-lysine, 50%                         | 3.500     |
| L-threonine                           | 0.640     |
| Total                                 | 1000      |
| Nutrient concentrations <sup>2)</sup> |           |
| Dry matter (%)                        | 88.300    |
| Crude protein (%)                     | 21.000    |
| Metabolizable energy (Mcal/kg)        | 3.087     |
| Choline (mg/kg)                       | 2.000     |
| Arginine (%)                          | 1.210     |
| Linoleic acid (%)                     | 1.200     |
| Total lysine (%)                      | 1.150     |
| Total calcium (%)                     | 1.050     |
| Methionine + cystine (%)              | 0.840     |
| Valine (%)                            | 0.830     |
| Total Threonine (%)                   | 0.820     |
| Isoleucine (%)                        | 0.790     |
| Total methionine (%)                  | 0.530     |
| Phosphorus available (%)              | 0.500     |
| Digestible phosphorus (%)             | 0.480     |
| Total tryptophan (%)                  | 0.210     |
| Total chlorine (%)                    | 0.200     |
| Total sodium (%)                      | 0.200     |

<sup>1)</sup> The premix provided the following per kilogram diet: vitamin A 10, 000 IU, vitamin D<sub>3</sub> 2000 IU, vitamin E 10 IU, vitamin K<sub>3</sub> 2.5 mg, vitamin B<sub>1</sub> 1 mg, vitamin B<sub>2</sub> 6 mg, vitamin B<sub>3</sub> 10 mg, vitamin B<sub>5</sub> 40 mg, vitamin B<sub>6</sub> 3 mg, vitamin B<sub>11</sub> 0.3 mg, vitamin B<sub>12</sub> 0.01 mg, biotin 0.12 mg, Cu (as copper sulfate) 8 mg, Fe (as ferrous sulfate) 80 mg, Mn (as manganese sulfate) 60 mg, Zn (as zinc sulfate) 40 mg, Se (as sodium selenite) 0.15 mg, I (as potassium iodide) 0.35 mg.

<sup>2)</sup> Calculated nutrient concentrations.
